# Supplementary material
Source: Springer Nature journal article supplement (https://www.springermedizin.de/resource/supplementary/12969_2007_4_MOESM1_ESM.pdf/9592194)

A

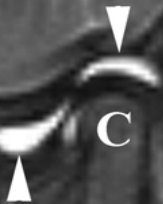

B

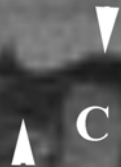

Supplement: MOESM1 [file 9592194]
